11. Fergusson DA, Hébert PC, Mazer CD, Fremes S, MacAdams C, Murkin JM, Teoh K, Duke PC, Arellano R, Blajchman MA, Bussi eres JS, C  t   D, Karski J, Martineau R, Robblee JA, Rodger M, Wells G, Clinch J, Pretorius R, BART Investigators: A comparison of aprotinin and lysine analogues in high-risk cardiac surgery. *N Engl J Med* 2008; 358:2319–31
12. Murkin JM: Lessons learned in antifibrinolytic therapy: The BART trial. *Semin Cardiothorac Vasc Anesth* 2009; 13:127–31
13. Ide M, Bolliger D, Taketomi T, Tanaka KA: Lessons from the aprotinin saga: Current perspective on antifibrinolytic therapy in cardiac surgery. *J Anesth* 2010; 24:96–106
14. Henry DA, Carless PA, Moxey AJ, O’Connell D, Stokes BJ, McClelland B, Laupacis A, Fergusson D: Anti-fibrinolytic use for minimising perioperative allogeneic blood transfusion. *Cochrane Database Syst Rev* 2007:CD001886
15. Shakur H, Roberts I, Bautista R, Caballero J, Coats T, Dewan Y, El-Sayed H, Gogichaishvili T, Gupta S, Herrera J, Hunt B, Iribhogbe P, Izurieta M, Khamis H, Komolafe E, Marrero MA, Mej  a-Mantilla J, Miranda J, Morales C, Olaomi O, Oлдashi F, Perel P, Peto R, Ramana PV, Ravi RR, Yutthakasemsunt S, CRASH-2 trial collaborators: Effects of tranexamic acid on death, vascular occlusive events, and blood transfusion in trauma patients with significant haemorrhage (CRASH-2): A randomised, placebo-controlled trial. *Lancet* 2010; 376:23–32
16. Levy JH: Antifibrinolytic therapy: New data and new concepts. *Lancet* 2010; 376:3–4
17. Shakur H, Elbourne D, Gulmezoglu M, Alfirevic Z, Ronsmans C, Allen E, Roberts I: The WOMAN Trial (World Maternal Antifibrinolytic Trial): Tranexamic acid for the treatment of postpartum haemorrhage: An international randomised, double blind placebo controlled trial. *Trials* 2010; 11:40

## ANESTHESIOLOGY REFLECTIONS

### The “Blue Light Anaesthesia” of Redard

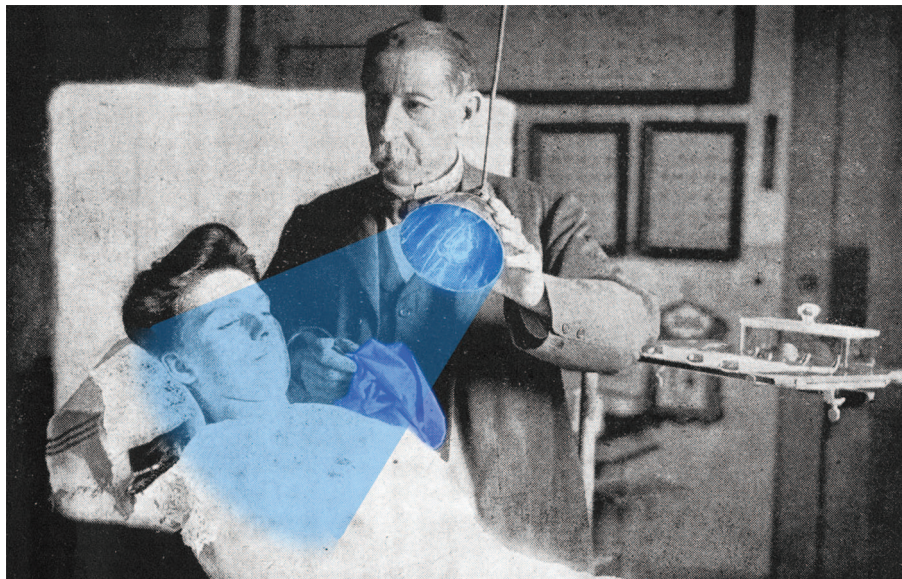

Some 14 yr after his 1890 presentations on ethyl chloride and cocaine as local anesthetics in Berlin, Swiss physician Camille Redard (1841–1910) received publicity worldwide (see *above*) for using blue light as an anesthetic for dental extractions. He asked patients “to gaze fixedly” at a reflector-fitted light bulb and then to open their eyes while assuring them that they would “feel no pain.” Redard enhanced blueness of the light by draping a “blue veil of satinette” over both light and patient. Sleep occurred in 3 min — or less time, if soothing music was played. Although Redard felt that hypnosis might be occurring, he suggested that “an optic nerve effect” was involved, since only blue-colored light rays were soporific. (Copyright   the American Society of Anesthesiologists, Inc. This image appears in color in the *Anesthesiology Reflections* online collection available at [www.anesthesiology.org](http://www.anesthesiology.org).)

George S. Bause, M.D., M.P.H., Honorary Curator, ASA’s Wood Library-Museum of Anesthesiology, Park Ridge, Illinois, and Clinical Associate Professor, Case Western Reserve University, Cleveland, Ohio. [UJYC@aol.com](mailto:UJYC@aol.com).
